# Supplementary material
Source: PubMed Central journal article supplement (PMC6501776)
Supplement: NIHMS1504862-supplement-F1.pdf [file NIHMS1504862-supplement-F1.pdf]

**A**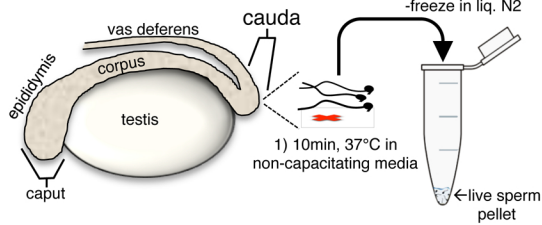**B**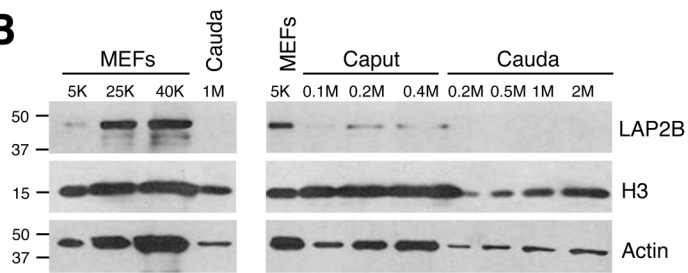**C**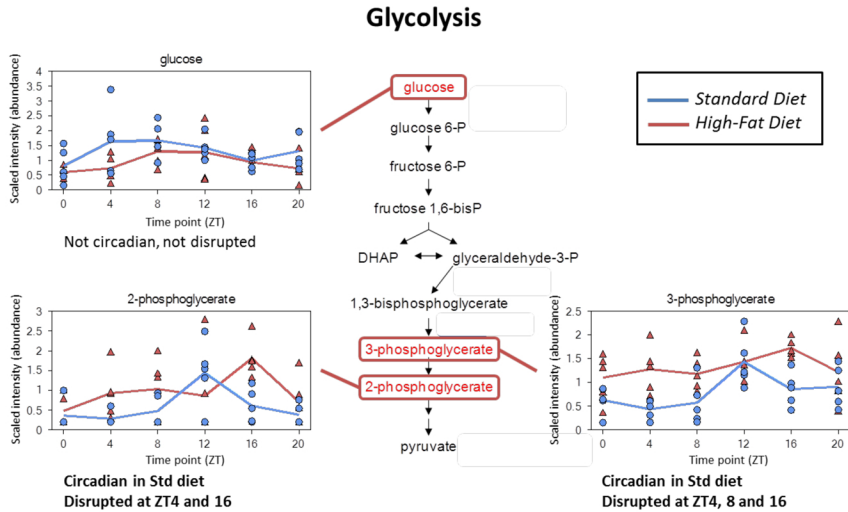**D**

| Lysolipid                                    | ZT0  | ZT4  | ZT8  | ZT12 | ZT16 | ZT20 |
|----------------------------------------------|------|------|------|------|------|------|
| 1-palmitoylglycerophosphoethanolamine        | 1.54 | 0.99 | 1.32 | 0.91 | 1.03 | 1.32 |
| 2-palmitoylglycerophosphoethanolamine        | 1    | 1.02 | 1.06 | 0.56 | 0.9  | 0.41 |
| 1-stearoylglycerophosphoethanolamine         | 0.86 | 1.09 | 1.04 | 0.64 | 0.93 | 0.62 |
| 1-oleoylglycerophosphoethanolamine           | 1.14 | 1.03 | 1.21 | 0.74 | 0.97 | 1    |
| 2-oleoylglycerophosphoethanolamine           | 0.63 | 1.01 | 1.2  | 0.45 | 0.71 | 0.58 |
| 1-arachidonoylglycerophosphoethanolamine     | 1.13 | 0.85 | 1.01 | 0.91 | 1    | 1.18 |
| 2-arachidonoylglycerophosphoethanolamine     | 1.21 | 0.94 | 1.21 | 0.91 | 1.14 | 0.92 |
| 2-docosapentaenoylglycerophosphoethanolamine | 0.7  | 1.3  | 1.01 | 0.57 | 0.96 | 0.56 |
| 2-docosahexaenoylglycerophosphoethanolamine  | 0.68 | 1.12 | 0.94 | 0.59 | 1.02 | 0.61 |
| 1-myristoylglycerophosphocholine             | 0.7  | 0.87 | 1.31 | 0.6  | 0.71 | 0.47 |
| 1-palmitoylglycerophosphocholine             | 0.78 | 1.13 | 1.22 | 0.54 | 0.87 | 0.53 |
| 2-palmitoylglycerophosphocholine             | 0.61 | 1.51 | 1.33 | 0.65 | 0.91 | 0.53 |
| 1-palmitoleoylglycerophosphocholine          | 0.66 | 0.86 | 0.62 | 0.64 | 0.84 | 0.74 |
| 1-stearoylglycerophosphocholine              | 0.81 | 1.11 | 1.06 | 0.58 | 0.89 | 0.6  |
| 2-stearoylglycerophosphocholine              | 0.71 | 1.2  | 1.01 | 0.88 | 0.91 | 0.52 |
| 1-oleoylglycerophosphocholine                | 0.64 | 1.12 | 1.17 | 0.57 | 0.85 | 0.57 |
| 2-oleoylglycerophosphocholine                | 0.59 | 1.23 | 1.1  | 0.52 | 0.81 | 0.63 |
| 1-linoleoylglycerophosphocholine             | 0.7  | 0.88 | 1.06 | 0.68 | 0.96 | 0.65 |
| 2-arachidonoylglycerophosphocholine          | 0.54 | 1.09 | 1.15 | 0.55 | 1.02 | 0.62 |
| 1-docosapentaenoylglycerophosphocholine      | 0.66 | 1.2  | 0.6  | 1.01 | 0.9  | 0.81 |
| 2-docosapentaenoylglycerophosphocholine      | 0.6  | 1.28 | 1.03 | 0.6  | 0.92 | 0.59 |
| 2-docosahexaenoylglycerophosphocholine       | 0.63 | 1.19 | 0.99 | 0.63 | 0.99 | 0.54 |
| 1-stearoylglycerophosphoinositol             | 1.27 | 1.07 | 1.59 | 0.88 | 1.04 | 0.88 |
| 1-palmitoylplasmenylethanolamine             | 1.3  | 1.13 | 1.14 | 0.77 | 0.94 | 1    |
