# Supplementary material
Source: PubMed Central journal article supplement (PMC6501776)
Supplement: NIHMS1504862-supplement-F4.pdf [file NIHMS1504862-supplement-F4.pdf]

**A**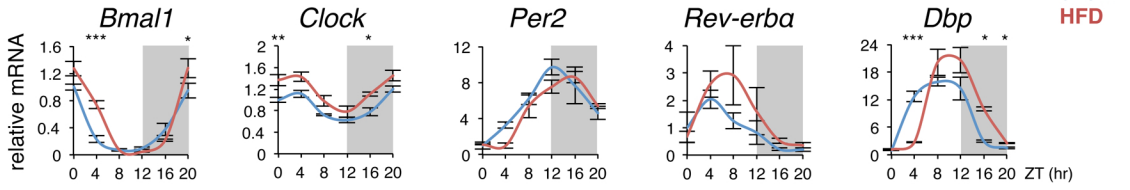**B**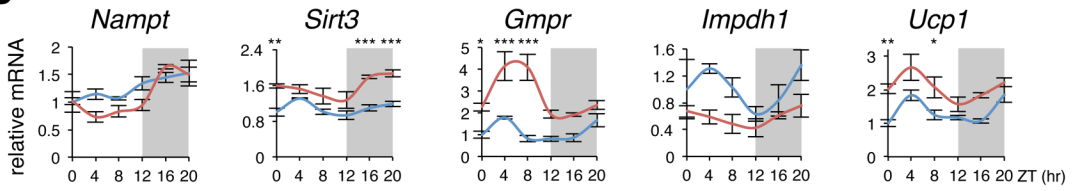**C**

| gene            | diet effect p-value |
|-----------------|---------------------|
| <i>Bmal1</i>    | 0.0002              |
| <i>Clock</i>    | < 0.0001            |
| <i>Per2</i>     | 0.2189              |
| <i>Rev-erba</i> | 0.0897              |
| <i>Dbp</i>      | 0.1017              |
| <i>Nampt</i>    | 0.0561              |
| <i>Sirt3</i>    | < 0.0001            |
| <i>Gmpr</i>     | < 0.0001            |
| <i>Impdh1</i>   | 0.0004              |
| <i>Ucp1</i>     | < 0.0001            |
