# Supplementary material
Source: PubMed Central journal article supplement (PMC6501776)
Supplement: NIHMS1504862-supplement-T1.pdf [file NIHMS1504862-supplement-T1.pdf]

| <b>SCN</b>                                           | <b><i>p</i>-value</b> |
|------------------------------------------------------|-----------------------|
| Polyunsaturated Fatty Acid (n3 & n6)                 | 0.001                 |
| Long Chain Fatty Acid                                | 0.006                 |
| Purine Metabolism, (Hypo)Xanthine/Inosine containing | 0.007                 |
| Urea cycle; Arginine & Proline Metabolism            | 0.021                 |
| Lysine Metabolism                                    | 0.038                 |

| <b>mPFC</b>                               | <b><i>p</i>-value</b> |
|-------------------------------------------|-----------------------|
| Phospholipid Metabolism                   | 0.000                 |
| Long Chain Fatty Acid                     | 0.013                 |
| Phosphatidylserine (PS)                   | 0.021                 |
| Urea cycle; Arginine & Proline Metabolism | 0.028                 |

| <b>muscle</b>           | <b><i>p</i>-value</b> |
|-------------------------|-----------------------|
| Sphingolipid Metabolism | 0.010                 |
| Dipeptide               | 0.011                 |
| Diacylglycerol          | 0.014                 |
| Lysolipid               | 0.015                 |
| Glycogen Metabolism     | 0.034                 |
| Phospholipid Metabolism | 0.035                 |

| <b>BAT</b>                                           | <b><i>p</i>-value</b> |
|------------------------------------------------------|-----------------------|
| Lysine Metabolism                                    | 0.017                 |
| Purine Metabolism, (Hypo)Xanthine/Inosine containing | 0.024                 |
| Leucine, Isoleucine & Valine Metabolism              | 0.046                 |
| Urea cycle; Arginine & Proline Metabolism            | 0.047                 |

| <b>WAT</b>            | <b><i>p</i>-value</b> |
|-----------------------|-----------------------|
| Long Chain Fatty Acid | 0.002                 |

| <b>liver</b>            | <b><i>p</i>-value</b> |
|-------------------------|-----------------------|
| Long chain fatty acid   | 0.005                 |
| Glycerolipid metabolism | 0.032                 |

| <b>serum</b>              | <b><i>p</i>-value</b> |
|---------------------------|-----------------------|
| Fatty acid, dicarboxylate | 0.001                 |

| <b>sperm</b>                         | <b><i>p</i>-value</b> |
|--------------------------------------|-----------------------|
| Nicotinate & nicotinamide metabolism | 0.037                 |
