# Supplementary material
Source: PubMed Central journal article supplement (PMC6501776)
Supplement: NIHMS1504862-supplement-T2.pdf [file NIHMS1504862-supplement-T2.pdf]

**circadian metabolites chow**

| <b>serum</b>          | <b>p</b> |
|-----------------------|----------|
| Lysolipid             | 0.000    |
| Long Chain Fatty Acid | 0.000    |
| Essential Fatty Acid  | 0.001    |
| Carnitine Metabolism  | 0.043    |

| <b>muscle</b> | <b>p</b> |
|---------------|----------|
| Dipeptide     | 0.001    |

| <b>BAT</b>      | <b>p</b> |
|-----------------|----------|
| Lysolipid       | 0.002    |
| Lysoplasmalogen | 0.041    |

| <b>liver</b>                               | <b>p</b> |
|--------------------------------------------|----------|
| Pyrimidine Metabolism, Cytidine containing | 0.008    |
| Fatty Acid Metabolism (Acyl Carnitine)     | 0.017    |
| Urea cycle; Arginine & Proline Metabolism  | 0.020    |
| Monoacylglycerol                           | 0.047    |

| <b>WAT</b>                       | <b>p</b> |
|----------------------------------|----------|
| Guanidino & Acetamido Metabolism | 0.018    |

| <b>sperm</b>                                     | <b>p</b> |
|--------------------------------------------------|----------|
| Glycolysis, Gluconeogenesis, Pyruvate metabolism | 0.009    |
| Pyrimidine Metabolism, Orotate containing        | 0.043    |

| <b>SCN</b>                                     | <b>p</b> |
|------------------------------------------------|----------|
| Leucine, Isoleucine & Valine Metabolism        | 0.001    |
| Methionine, Cysteine, SAM & Taurine Metabolism | 0.012    |
| Glutamate Metabolism                           | 0.022    |
| Urea cycle; Arginine & Proline Metabolism      | 0.036    |

| <b>mPFC</b>             | <b>p</b> |
|-------------------------|----------|
| Phospholipid Metabolism | 0.000    |
| Sphingolipid Metabolism | 0.000    |
| Diacylglycerol          | 0.001    |

**circadian metabolites both**

| <b>serum</b>                                   | <b>p</b> |
|------------------------------------------------|----------|
| Leucine, Isoleucine & Valine Metabolism        | 0.002    |
| Gamma-Glutamyl                                 | 0.003    |
| Methionine, Cysteine, SAM & Taurine Metabolism | 0.020    |
| Pyrimidine metabolism, Uracil containing       | 0.027    |

| <b>muscle</b>                                      | <b>p</b> |
|----------------------------------------------------|----------|
| Glycolysis, Gluconeogenesis, & Pyruvate Metabolism | 0.000    |
| Urea cycle; Arginine & Proline Metabolism          | 0.003    |
| Leucine, Isoleucine & Valine Metabolism            | 0.015    |

| <b>BAT</b>                               | <b>p</b> |
|------------------------------------------|----------|
| Dipeptide                                | 0.000    |
| Pyrimidine metabolism, Uracil containing | 0.014    |

| <b>liver</b>                             | <b>p</b> |
|------------------------------------------|----------|
| Fructose, Mannose & Galactose Metabolism | 0.006    |
| Lysine Metabolism                        | 0.007    |
| Glutathione Metabolism                   | 0.017    |
| Pantothenate & CoA Metabolism            | 0.028    |

| <b>WAT</b>        | <b>p</b> |
|-------------------|----------|
| Lysine Metabolism | 0.024    |

| <b>sperm</b>     | <b>p</b> |
|------------------|----------|
| Monoacylglycerol | 0.022    |

| <b>SCN</b>           | <b>p</b> |
|----------------------|----------|
| Histidine Metabolism | 0.002    |
| Diacylglycerol       | 0.042    |

| <b>mPFC</b>                               | <b>p</b> |
|-------------------------------------------|----------|
| Histidine Metabolism                      | 0.001    |
| Diacylglycerol                            | 0.003    |
| Pyrimidine Metabolism, Thymine containing | 0.047    |
| Nicotinate & Nicotinamide Metabolism      | 0.049    |

**circadian metabolites HFD**

| <b>serum</b>                           | <b>p</b> |
|----------------------------------------|----------|
| Dipeptide                              | 0.005    |
| Glycine, Serine & Threonine Metabolism | 0.041    |

| <b>muscle</b>                          | <b>p</b> |
|----------------------------------------|----------|
| Glycine, Serine & Threonine Metabolism | 0.000    |
| Fatty Acid Metabolism (Acyl Carnitine) | 0.001    |
| Alanine & Aspartate Metabolism         | 0.023    |
| Polyamine Metabolism                   | 0.049    |

| <b>BAT</b>                            | <b>p</b> |
|---------------------------------------|----------|
| Lysine Metabolism                     | 0.031    |
| Purine Metabolism, Guanine containing | 0.031    |

| <b>liver</b> | <b>p</b> |
|--------------|----------|
| n/a          | n/a      |

| <b>WAT</b>            | <b>p</b> |
|-----------------------|----------|
| Long Chain Fatty Acid | 0.032    |

| <b>sperm</b>            | <b>p</b> |
|-------------------------|----------|
| Glycerolipid Metabolism | 0.002    |

| <b>SCN</b>                                     | <b>p</b> |
|------------------------------------------------|----------|
| Diacylglycerol                                 | 0.000    |
| Sphingolipid Metabolism                        | 0.000    |
| Fatty Acid Metabolism (Acyl Carnitine)         | 0.000    |
| Lysoplasmalogen                                | 0.009    |
| Phospholipid Metabolism                        | 0.013    |
| Plasmalogen                                    | 0.029    |
| Polyamine Metabolism                           | 0.030    |
| Methionine, Cysteine, SAM & Taurine Metabolism | 0.045    |

| <b>mPFC</b>                               | <b>p</b> |
|-------------------------------------------|----------|
| Nucleotide Sugar                          | 0.007    |
| Fructose, Mannose & Galactose Metabolism  | 0.008    |
| Pyrimidine Metabolism, Orotate containing | 0.017    |
