# Supplementary material
Source: PubMed Central journal article supplement (PMC6501776)
Supplement: NIHMS1504862-supplement-T3.pdf [file NIHMS1504862-supplement-T3.pdf]

## correlated metabolites chow

| <b>Serum</b>                                               | <b>p</b> |
|------------------------------------------------------------|----------|
| Essential fatty acid                                       | 0.005    |
| Medium chain fatty acid                                    | 0.016    |
| Lysolipid                                                  | 0.023    |
| <b>muscle</b>                                              | <b>p</b> |
| Fatty Acid Metabolism(Acyl Carnitine)                      | 0.000    |
| Glycolysis, Gluconeogenesis, & Pyruvate Metabolism         | 0.001    |
| Urea cycle; Arginine & Proline Metabolism                  | 0.019    |
| Glycogen Metabolism                                        | 0.029    |
| TCA Cycle                                                  | 0.035    |
| Pantothenate & CoA Metabolism                              | 0.042    |
| Dipeptide                                                  | 0.047    |
| <b>BAT</b>                                                 | <b>p</b> |
| Pyrimidine Metabolism, Uracil containing                   | 0.003    |
| Pyrimidine Metabolism, Cytidine containing                 | 0.014    |
| Dipeptide                                                  | 0.034    |
| <b>liver</b>                                               | <b>p</b> |
| Fructose, mannose, galactose, starch, & sucrose metabolism | 0.000    |
| Pyrimidine metabolism, uracil containing                   | 0.024    |
| Cysteine, methionine, SAM, taurine metabolism              | 0.049    |
| <b>SCN</b>                                                 | <b>p</b> |
| Histidine Metabolism                                       | 0.000    |
| <b>mPFC</b>                                                | <b>p</b> |
| Histidine Metabolism                                       | 0.000    |

## correlated metabolites HFD

| <b>Serum</b>                                               | <b>p</b> |
|------------------------------------------------------------|----------|
| Valine, leucine & isoleucine metabolism                    | 0.002    |
| Cysteine, methionine, SAM, taurine metabolism              | 0.024    |
| <b>muscle</b>                                              | <b>p</b> |
| Glycolysis, Gluconeogenesis, & Pyruvate Metabolism         | 0.004    |
| Histidine Metabolism                                       | 0.004    |
| Leucine, Isoleucine & Valine Metabolism                    | 0.008    |
| Glycine, Serine & Threonine Metabolism                     | 0.027    |
| Urea cycle; Arginine & Proline Metabolism                  | 0.030    |
| <b>BAT</b>                                                 | <b>p</b> |
| Polyunsaturated Fatty Acid (n3 & n6)                       | 0.004    |
| Dipeptide                                                  | 0.021    |
| <b>liver</b>                                               | <b>p</b> |
| Fructose, mannose, galactose, starch, & sucrose metabolism | 0.008    |
| Glutathione metabolism                                     | 0.020    |
| gamma-glutamyl                                             | 0.020    |
| Pantothenate & CoA metabolism                              | 0.032    |
| <b>SCN</b>                                                 | <b>p</b> |
| Histidine Metabolism                                       | 0.001    |
| Lysoplasmalogen                                            | 0.006    |
| <b>mPFC</b>                                                | <b>p</b> |
| Purine Metabolism, (Hypo)Xanthine/Inosine containing       | 0.003    |
| Tocopherol Metabolism                                      | 0.010    |
| Polyamine Metabolism                                       | 0.048    |
