# Supplementary material
Source: PubMed Central journal article supplement (PMC6501776)

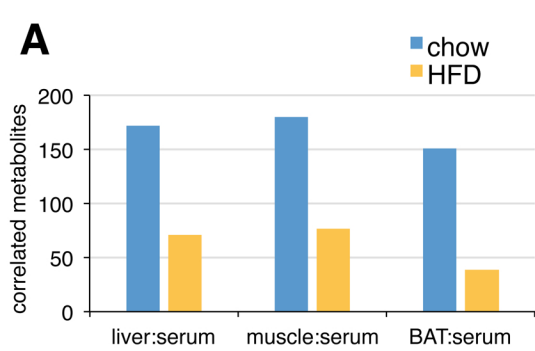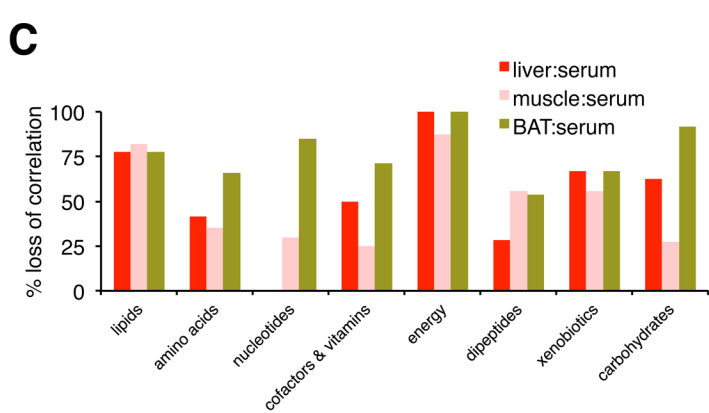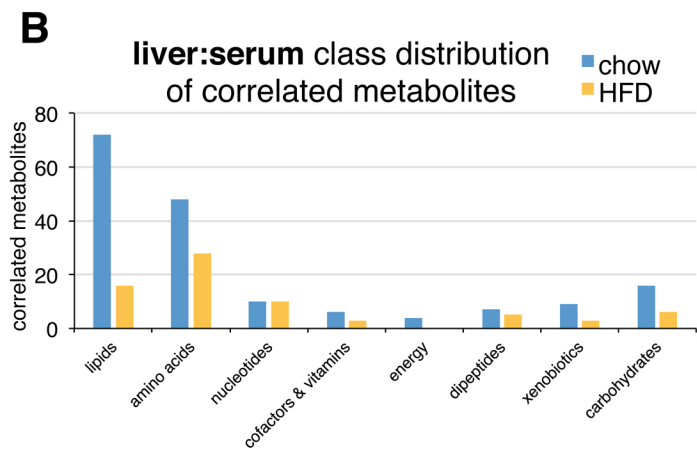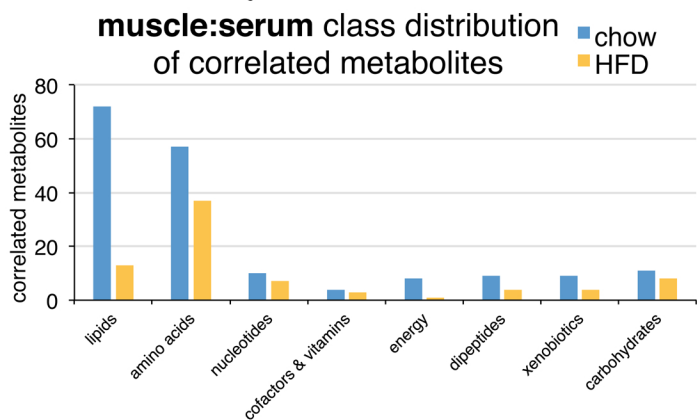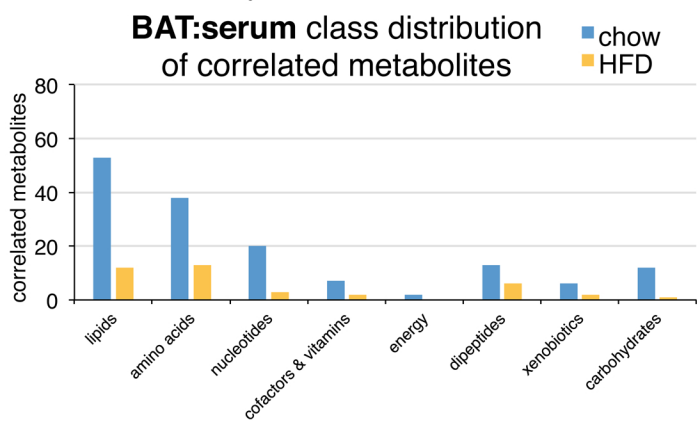

Supplement: NIHMS1504862-supplement-F2.pdf [file NIHMS1504862-supplement-F2.pdf]

**A**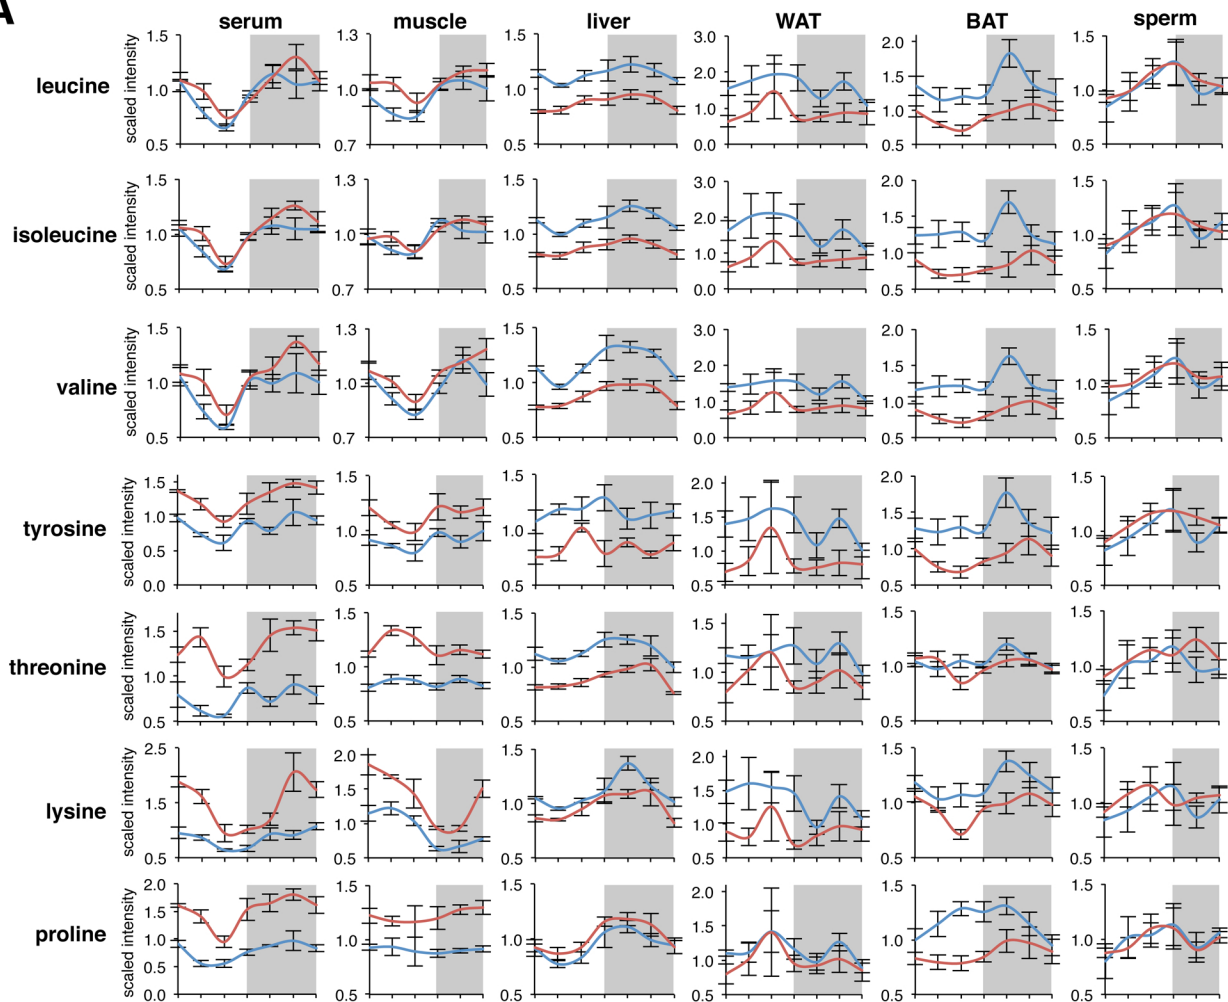**B**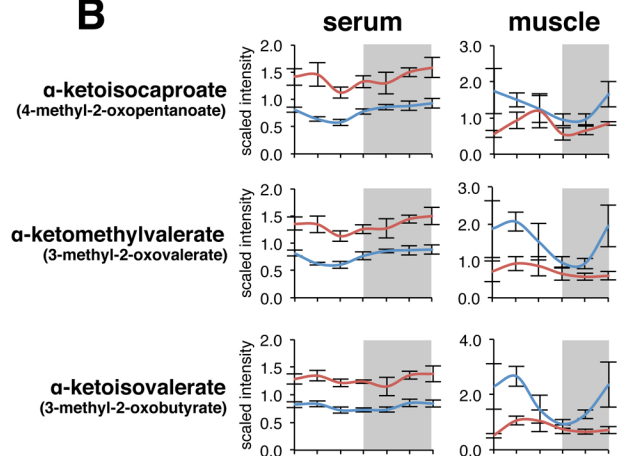

Supplement: NIHMS1504862-supplement-F3.pdf [file NIHMS1504862-supplement-F3.pdf]
